# Supplementary material for: NAT10 Maintains OGA mRNA Stability Through ac4C Modification in Regulating Oocyte Maturation
Source: PubMed Central journal article supplement (PMC9352860; doi:10.3389/fendo.2022.907286), 2022-07-22

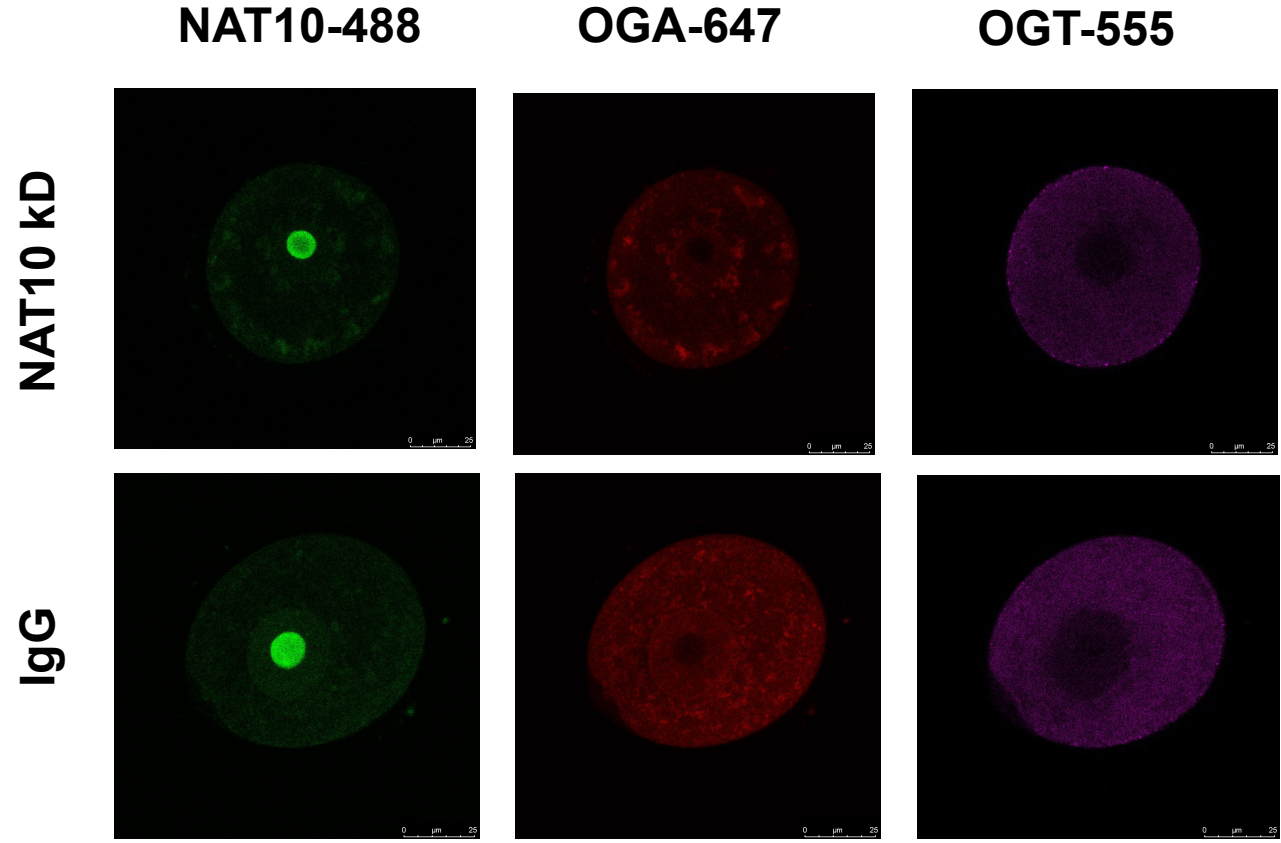

Supplement: Image_1.pdf [file Image_1.pdf]
